# Supplementary material
Source: MDPI journal article supplement (https://www.mdpi.com/2073-4360/4/4/1657)
Supplement: s1 [file s1]

**Supporting Information**

**Scheme S1.** Schematic representation of complex **1** and the equilibrium between **1** and **1'**.

**Scheme S2.** Schematic representation of the rearrangement of the *η*4-NBD ligand to a carbene ligand [1,2].

**Figure S1.** (**a**) 1H and (**b**) 13C{1H} NMR spectra (CCl4) of **PNBE** obtained from the reaction of **1** and **NBE** in CH2Cl2.

**(a)**

5,6

1,4*c*

1,4*t*

7

5,6

7

D2O

ppm

2,3*c*

2,3*t*

**(b)**

ppm

*tt*

*tc*

2,3*c*

1,4*tt*

2,3*t*

7c*c*

7ct=7tc

1,4*tc*

7*tt*

*cc*

1,4

5,6

*tc*

5,6

*ct*

*cc*

**Figure S2.** (**a**) 1H and (**b**) 13C{1H} NMR spectra (CDCl3) of the soluble part of **PNBD** obtained from the reaction of **1** and **NBD** in toluene. Signal denoted by “S” is due to
the solvent.

**(a)**

5,6*t*

2,*3t*

2,3*c*

1,4*c*

1,4*t*

7

7 and S

5,6*c*

ppm

**(b)**

2,3

*tc*

t*t*

*ct=tc*

*cc*

5,6

t*t*

c*t*

*cc*

*cc*

*ct*

*tt*

*tc*

7

1,4

*tt*

*tc=ct*

1,4

**Figure S3.** 1H-NMR spectra (region 7.0–0.6 ppm) of **1** in THF-*d*8 (a) and from the reaction of **1** (8.0 mg, 0.008 mmol) with **NBD** (15.1 mg, 0.16 mmol) in THF-*d*8 at various time intervals, as indicated (b-d). Signals denoted by “S” are due to the solvent, “M1” to **NBD**, “*****” to coordinated THF of **1**, “c” to *exo*-2-chloronorborn-5-ene, and “ct” to
*exo*-3-chloronortricyclane.

**Figure S4.** 1H-NMR spectra (region 14.0–10.0 ppm) of **1** in THF-*d*8 (**a**) and from the reaction of **1** (8.0 mg, 0.008 mmol) with **NBD** (15.1 mg, 0.16 mmol) in THF-*d*8 at various time intervals, as indicated (**b**–**d**).

**Figure S5.** 1H-NMR spectra of **NBD** in THF-*d*8 (**a**) and from the reaction of **1** (8.0 mg, 0.008 mmol) with **NBD** (0.8 mg, 0.008 mmol) in THF-*d*8 at various time intervals, as indicated (**b**–**f**). Signals denoted by “S” are due to the solvent, “M1” to **NBD**, “*****” to coordinated THF of **1**, and “c” to *exo*-2-chloronorborn-5-ene.

**Figure S6.** 1H-NMR spectra (region 13.0–9.5 ppm) from the reaction of **1** (8.0 mg,
0.008 mmol) with **NBE** (150.6 mg, 1.60 mmol) in THF-*d*8 at various time intervals, as
indicated (**a**–**e**).

(d) 20h

(a)

**Figure S7.** 1H-NMR spectra (region 5.4–1.5 ppm) from the reaction of **1** (8.0 mg,
0.008 mmol) with **NBE** (150.6 mg, 1.60 mmol) in THF-*d*8 at various time intervals, as indicated (**a**–**e**). Signals denoted by “*****” are due to coordinated THF of **1**, “S” to the solvent, “M2” to **NBE**, “P” to **PNBE**, and “c'” to *exo*-2-chloronorbornane.

References

1. Jayaraman, A.; Berner, G.M.; Mihichuk, L.M.; East, A.L.L. Tungsten(II)-catalyzed rearrangements of norbornadiene: effects of alternative complexation stages. *J. Mol. Catal. A Chem.* **2011**, *351*, 143–153.

2. Handzlic, J.; Stosur, M.; Kochel, A.; Szymańska-Buzar, T. Norbornadiene complexes of molybdenum(II) and their transformation to a catalyst for ring-opening metathesis polymerization: DFT calculations—X-ray crystal structure of a new norbornadiene complex [MoCl(GeCl3)(CO)3(*η*4-nbd)]. *Inorg. Chim. Acta* **2008**, *361*, 502–512.
